# Supplementary material for: Farmers’ Variety Naming and Crop Varietal Diversity of Two Cereal and Three Legume Species in the Moroccan High Atlas, Using DATAR
Source: MDPI journal article supplement (doi:10.3390/su151310411), 2023-07-01
Supplement: s1 [file s1]

## Supplementary Materials

**Table S1.** Detailed biophysical and socio-economic characteristics of field sites (FGD – Focus Groups Discussions; HHS – Household Surveys)

| Name of douar/<br>hamlet (Hub)    | FAO Agro-<br>ecological<br>Zone <sup>1</sup>                                        | Amazigh<br>Tribe <sup>2</sup> | N°<br>FGD | N°<br>HHS | Eleva-<br>tion <sup>3</sup><br>(m) | Rain-<br>fall <sup>4</sup><br>(mm) | Tempe-<br>rature <sup>4</sup><br>(°C) | Climate <sup>5</sup>                                  | Soil type <sup>6</sup> | Accessi-<br>bility by<br>road <sup>7</sup> | Distanc<br>e local<br>market <sup>7</sup> | Size<br>nearest<br>market <sup>7</sup> | Main<br>economic<br>activities <sup>7</sup>     | Economic<br>conditions <sup>7</sup> | Surface<br>of plots <sup>7</sup> | Water<br>availa-<br>bility <sup>7</sup> |
|-----------------------------------|-------------------------------------------------------------------------------------|-------------------------------|-----------|-----------|------------------------------------|------------------------------------|---------------------------------------|-------------------------------------------------------|------------------------|--------------------------------------------|-------------------------------------------|----------------------------------------|-------------------------------------------------|-------------------------------------|----------------------------------|-----------------------------------------|
| Asni*<br>(Al Haouz)               | Sub-<br>tropics,<br>mod. cool;<br>semi-arid,<br>no<br>soil/terrain<br>limitations   | Rhirhaya                      | 0         | 45        | 1183                               | 453                                | 15                                    | Long<br>cold<br>winter,<br>short dry<br>summer        | Calcic<br>Xerosols     | Mediu<br>m                                 | Mediu<br>m                                | Big                                    | Tourism,<br>agriculture,<br>livestock,<br>trade | Good                                | High                             | Medium                                  |
| Talat<br>N'Yaaqoub*<br>(Al Haouz) | Sub-<br>tropics,<br>mod. cool;<br>semi-arid,<br>with<br>soil/terrain<br>limitations | Goundafa                      | 0         | 15        | 1186                               | 438                                | 15                                    | Long<br>cold<br>winter,<br>short dry<br>summer        | Lithosols              | Low                                        | Near                                      | Small                                  | Agriculture,<br>livestock                       | Low                                 | Medium                           | Medium                                  |
| Oukaïmeden<br>(Al Haouz)          | Sub-<br>tropics,<br>cool; semi-<br>arid, with<br>soil/terrain<br>limitations        | Rhirhaya                      | 1         | 0         | 2599                               | 581                                | 9                                     | Very cold<br>winter,<br>mild<br>summer                | Lithosols              | Mediu<br>m                                 | Far                                       | Small                                  | Tourism,<br>livestock,<br>agriculture           | Medium                              | Low                              | High                                    |
| Amizmiz<br>(Al Haouz)             | Sub-<br>tropics,<br>mod. cool;<br>semi-arid,<br>no<br>soil/terrain<br>limitations   | Kdamoute                      | 0         | 5         | 931                                | 438                                | 16                                    | Short<br>cold<br>winter,<br>long hot<br>dry<br>summer | Calcic<br>Xerosols     | High                                       | Near                                      | Big                                    | Trade,<br>agriculture,<br>livestock             | Good                                | High                             | Low                                     |
| Anamer-<br>Taourirt<br>(Al Haouz) | Land with<br>severe<br>soil/terrain<br>limitations                                  | Goundafa                      | 2         | 90        | 1633                               | 509                                | 12                                    | Long<br>cold<br>winter,<br>short dry<br>summer        | Lithosols              | Low                                        | Far                                       | Small                                  | Agriculture,<br>livestock                       | Low                                 | Low                              | Medium                                  |

|                                        |                                                                                         |                |   |    |      |     |    |                                                       |                    |            |            |            |                                                 |        |        |        |
|----------------------------------------|-----------------------------------------------------------------------------------------|----------------|---|----|------|-----|----|-------------------------------------------------------|--------------------|------------|------------|------------|-------------------------------------------------|--------|--------|--------|
| Ighrem<br>(Al Haouz)                   | Land with<br>severe<br>soil/terrain<br>limitations                                      | Goundafa       | 0 | 5  | 1057 | 442 | 15 | Long<br>cold<br>winter,<br>short dry<br>summer        | Lithosols          | Low        | Far        | Small      | Agriculture,<br>livestock                       | Low    | Low    | Medium |
| Aagrab - Tnin<br>Ourika*<br>(Al Haouz) | Sub-<br>tropics,<br>mod. cool;<br>semi-arid,<br>no<br>soil/terrain<br>limitations       | Ourika         | 0 | 35 | 850  | 365 | 17 | Short<br>cold<br>winter,<br>long hot<br>dry<br>summer | Calcic<br>Xerosols | High       | Near       | Big        | Tourism,<br>agriculture,<br>trade,<br>livestock | Good   | Medium | High   |
| Ait Lkak<br>(Al Haouz)                 | Land with<br>severe<br>soil/terrain<br>limitations                                      | Ourika         | 0 | 65 | 1901 | 543 | 11 | Very cold<br>winter,<br>mild<br>summer                | Lithosols          | Mediu<br>m | Far        | Small      | Agriculture,<br>livestock                       | Medium | Low    | High   |
| Tahannaout<br>(Al Haouz)               | Sub-<br>tropics,<br>mod. cool;<br>semi-arid,<br>no<br>soil/terrain<br>limitations       | Rhirhaya       | 0 | 25 | 935  | 400 | 17 | Short<br>cold<br>winter,<br>long hot<br>dry<br>summer | Calcic<br>Xerosols | High       | Near       | Big        | Trade,<br>tourism,<br>agriculture,<br>livestock | Good   | High   | Low    |
| Tabant*<br>(Demnate)                   | Sub-<br>tropics,<br>cool; semi-<br>arid, with<br>soil/terrain<br>limitations            | Ait<br>Bougmez | 2 | 70 | 1860 | 334 | 12 | Cold<br>winter,<br>mild<br>summer                     | Rendzinas          | Mediu<br>m | Near       | Big        | Trade,<br>tourism,<br>agriculture,<br>livestock | Good   | Medium | High   |
| Ait Abbas<br>(Demnate)                 | Sub-<br>tropics,<br>mod. cool;<br>sub-<br>humid,<br>with<br>soil/terrain<br>limitations | Ait Abbas      | 0 | 85 | 1464 | 369 | 14 | Cold<br>winter,<br>mild<br>summer                     | Rendzinas          | Low        | Mediu<br>m | Mediu<br>m | Agriculture,<br>livestock                       | Medium | Medium | Medium |
| Iminifri<br>(Demnate)                  | Sub-<br>tropics,<br>mod. cool;<br>sub-<br>humid,<br>with                                | Oultana        | 2 | 55 | 1005 | 474 | 16 | Cold<br>winter,<br>dry<br>summer                      | Calcic<br>Xerosols | High       | Near       | Big        | Tourism,<br>agriculture                         | Good   | Low    | Medium |

| Commune                   | Climate                                                                                      | Soil                   | Altitude (m) | Population (2004) | Area (ha) | Number of farms | Number of farmers | Main crops                         | Main livestock | Main activities | Main constraints | Main opportunities | Main challenges                 | Main strengths | Main weaknesses | Main assets | Main liabilities |
|---------------------------|----------------------------------------------------------------------------------------------|------------------------|--------------|-------------------|-----------|-----------------|-------------------|------------------------------------|----------------|-----------------|------------------|--------------------|---------------------------------|----------------|-----------------|-------------|------------------|
|                           |                                                                                              |                        |              |                   |           |                 |                   |                                    |                |                 |                  |                    |                                 |                |                 |             |                  |
| Ait Boualli (Demnate)     | soil/terrain limitations<br>Sub-tropics, cool; semi-arid, with soil/terrain limitations      | Ftouaka                | 0            | 15                | 1685      | 364             | 12                | Cold winter, mild summer           | Rendzinas      | Low             | Far              | Small              | Livestock, agriculture, tourism | Low            | Low             | High        |                  |
| Ait Oumdis (Demnate)      | soil/terrain limitations<br>Sub-tropics, mod. cool; semi-arid, with soil/terrain limitations | Ftouaka                | 0            | 39                | 1286      | 437             | 16                | Cold winter, mild summer           | Lithosols      | Low             | Far              | Big                | Agriculture, livestock          | Low            | Medium          | High        |                  |
| Zaouiat Ahansal* (Azilal) | soil/terrain limitations<br>Sub-tropics, mod. cool; semi-arid, with soil/terrain limitations | Ihanesale n            | 0            | 55                | 1563      | 309             | 12                | long cold winter, mild summer      | Rendzinas      | Mediu m         | Mediu m          | Low                | Tourism, livestock              | Low            | Low             | High        |                  |
| Bernat (Azilal)           | soil/terrain limitations<br>Sub-tropics, mod. cool; sub-humid, with soil/terrain limitations | Ait Messat & Ait Attab | 0            | 60                | 1651      | 406             | 13                | long cold winter, mild summer      | Rendzinas      | High            | Near             | Big                | Agriculture, livestock          | Medium         | Medium          | High        |                  |
| Tamda Noumercid (Azilal)  | soil/terrain limitations<br>Sub-tropics, mod. cool; semi-arid, no soil/terrain limitations   | Ait Messat & Ait Attab | 2            | 35                | 1279      | 468             | 15                | Short cold winter, long hot summer | Rendzinas      | High            | Near             | Big                | Agriculture, livestock, trade   | Medium         | High            | Low         |                  |
| Ait M'hamed* (Azilal)     | soil/terrain limitations<br>Sub-tropics, mod. cool; sub-humid, with soil/terrain limitations | Ait Messat & Ait Attab | 2            | 0                 | 1704      | 401             | 13                | long cold winter, hot summer       | Rendzinas      | High            | Near             | Big                | Agriculture, livestock, trade   | Good           | High            | High        |                  |

|                     |                                                                                                          |                              |   |    |      |     |    |                                                |           |            |            |     |                                     |        |      |        |
|---------------------|----------------------------------------------------------------------------------------------------------|------------------------------|---|----|------|-----|----|------------------------------------------------|-----------|------------|------------|-----|-------------------------------------|--------|------|--------|
| Wabzaza<br>(Azilal) | soil/terrain<br>limitations<br>Dominantl<br>y very<br>steep<br>terrain<br>Sub-<br>tropics,<br>mod. cool; | Ait<br>Messat &<br>Ait Attab | 0 | 30 | 1599 | 390 | 14 | long cold<br>winter,<br>hot<br>summer          | Rendzinas | Low        | Far        | Big | Livestock                           | Low    | High | Low    |
| Talha<br>(Azilal)   | mod. cool;<br>semi-arid,<br>with<br>soil/terrain<br>limitations<br>Sub-<br>tropics,<br>mod. cool;        | Ait<br>Messat &<br>Ait Attab | 0 | 50 | 1272 | 470 | 16 | Short cold<br>winter,<br>long<br>hot<br>summer | Rendzinas | High       | Near       | Big | Agriculture,<br>livestock,<br>trade | Medium | High | Low    |
| Tissa<br>(Azilal)   | sub-<br>humid,<br>with<br>soil/terrain<br>limitations                                                    | Ait<br>Messat &<br>Ait Attab | 0 | 25 | 1598 | 440 | 13 | Short cold<br>winter,<br>long<br>hot<br>summer | Rendzinas | Mediu<br>m | Mediu<br>m | Big | Agriculture,<br>livestock           | Good   | High | Medium |

---

<sup>1</sup> Agroecological Zone description based on FAO's Global Agro-Ecological Zones v4 – Model documentation [19]; <sup>2</sup> Amazigh tribes taken from the portal "Tribus du Maroc" (<http://tribusdumaroc.free.fr/>); <sup>3</sup> Elevation values were extracted from the SRTM DEM available through NASA Earthdata at the address (<https://dwtkns.com/srtm30m/>); <sup>4</sup> Rainfall and Average Yearly Temperature data have been extracted from the WordClim historical datasets (period 1970-2000) ([www.worldclim.org](http://www.worldclim.org)); <sup>5</sup> Climate conditions descriptions are expressed in Koppen-Geiger climatic classification [18] (<http://www.gloh2o.org/koppen/>); <sup>6</sup> Soil types refer to the FAO Digital Soil Map of the World Version 3.6, January 2003; <sup>7</sup> Digital maps and community researchers and farmers expertise; \* Indicates location where local market (souk) inventories were carried out. Souks occur on a weekly basis at each of the 6 locations.

**Table S2.** Amazigh nouns and modifiers used to describe the observed diversity of the 5 species collected in local markets, focus group discussions and household surveys.

| Transliteration in<br>Tamazight*                                | Description                                                                                                                                                                                          | Transliteration<br>in Darija |
|-----------------------------------------------------------------|------------------------------------------------------------------------------------------------------------------------------------------------------------------------------------------------------|------------------------------|
| <b>Species names</b>                                            |                                                                                                                                                                                                      |                              |
| Timzt/Tomzin (Timzin)                                           | Barley ( <i>Hordeum vulgare</i> ). Usually used for non-modern varieties.                                                                                                                            | Chaiir                       |
| <i>Tachairine</i>                                               | Barley (of small sized grains), locally considered as ancient.                                                                                                                                       | Chaiir nabii                 |
| <i>Rwiza</i>                                                    | Modern varieties of barley.                                                                                                                                                                          | Rwiza                        |
| Irden                                                           | Durum wheat ( <i>Triticum durum</i> ). Without singular form. May refer to wheat in general ( <i>Triticum</i> spp.) although <i>Triticum aestivum</i> is usually called Gemh farina.                 |                              |
| Abaw / Ibawn                                                    | Fava bean.                                                                                                                                                                                           | Foul                         |
| Tibawin                                                         | Fava bean with small sized seeds ( <i>Vicia faba</i> )                                                                                                                                               | Fwiliya                      |
| Tanift / Tinifin/ Tinfin                                        | Pea with small round seeds ( <i>Pisum sativum</i> ). Usually used for non-modern varieties.                                                                                                          | Jelbana Beldi                |
| <i>Jelbana</i>                                                  | Pea ( <i>Pisum sativum</i> ).                                                                                                                                                                        | Jelbana                      |
| <i>Fessa / Lfest</i>                                            | Alfalfa ( <i>Medicago sativa</i> ). Literally means forage. The existing Tamazight terms for this species ikffis and tilfzt were not recorded.                                                       | Lfessa                       |
| <i>Fessa nsif/ Bersim</i>                                       | Summer forage (refers to <i>Trifolium alexandrinum</i> ). Although information was collected for this ethnotaxon, we did not include it in the analysis for not belonging to the 5 selected species. | Lfessa d sif/<br>Bersim      |
| <b>Modifiers</b>                                                |                                                                                                                                                                                                      |                              |
| <b>Perceived indigeneity/foreignity</b>                         |                                                                                                                                                                                                      |                              |
| <i>Beldi</i>                                                    | Traditional /old variety.                                                                                                                                                                            | Beldi                        |
| <i>Roumi</i>                                                    | Modern or creole. Referring to Rome as an indication of foreignness.                                                                                                                                 | Roumi                        |
| <b>Perceived historical antiquity</b>                           |                                                                                                                                                                                                      |                              |
| Aqdim / Taqdimt /<br>Iqdimen / Tiqdimin                         | Old/ancestral seeds.                                                                                                                                                                                 | Qdim                         |
| Akhatar / Takhatart /<br>Ikhatarn / Tikhatarin                  | Can refer to both old and large seeds.                                                                                                                                                               | Qdim/Kbir                    |
| <b>Preferred location</b>                                       |                                                                                                                                                                                                      |                              |
| Nodrar, N'adrar                                                 | From the mountains.                                                                                                                                                                                  | Djbel                        |
| N'azaghar                                                       | From the plains.                                                                                                                                                                                     | Lota                         |
| <b>Preferred irrigation conditions</b>                          |                                                                                                                                                                                                      |                              |
| <i>Bour</i>                                                     | From non-irrigated areas.                                                                                                                                                                            | Bour                         |
| <i>Sagya</i>                                                    | From irrigated areas.                                                                                                                                                                                | Sagya                        |
| <b>Preferred uses</b>                                           |                                                                                                                                                                                                      |                              |
| <i>Laalf</i>                                                    | For forage use.                                                                                                                                                                                      | Laalf                        |
| <b>Characteristics of the plant (size, life cycle)</b>          |                                                                                                                                                                                                      |                              |
| Igzuel / Tgzuel / Gzulen =<br>Iguezaen / Gzulent =<br>Tiguezaen | Short.                                                                                                                                                                                               | Qsir                         |
| Ighzif / Aghzaf / Ighzafen /<br>Tighzafin                       | Tall.                                                                                                                                                                                                | Twil                         |
| <i>Zerbana</i>                                                  | Early and fast growing variety.                                                                                                                                                                      | Zerbana                      |
| <b>Characteristics of seeds (size, productivity)</b>            |                                                                                                                                                                                                      |                              |

| Transliteration in<br>Tamazight*                                                                                                | Description                                                                                                                                                                       | Transliteration<br>in Darija |
|---------------------------------------------------------------------------------------------------------------------------------|-----------------------------------------------------------------------------------------------------------------------------------------------------------------------------------|------------------------------|
| Isdid / Tsdid / Isdidn /<br>Tosdadin = Tisdidin                                                                                 | Thin seeds.                                                                                                                                                                       | Rqiq                         |
| Ghilid / Ghlida / Ghlad /<br>Ghladat                                                                                            | Thick seeds.                                                                                                                                                                      | Ghlid                        |
| Mazozia                                                                                                                         | Can refer to either small grains or seeds planted at the end of the agricultural season in the summer to be harvested in the winter. Could Mazozia refer to a commercial variety. |                              |
| <b>Color of seeds</b>                                                                                                           |                                                                                                                                                                                   |                              |
| Omlil = Amllal / Tomlilt =<br>Tamllalt<br>Omliln = Imllaln / Tomlilin<br>= Timllalin                                            | White.                                                                                                                                                                            | Byed                         |
| Awragh / Tawraght<br>Iwraghn / Tiwraghin                                                                                        | Yellow.                                                                                                                                                                           | Sfer                         |
| Wrdi (Ouardi) / Wrdiya<br>Wrdayin / Wrdayat                                                                                     | Pink.                                                                                                                                                                             | Wrdi                         |
| Azgagh / Tazgaght<br>Izgaghn / Tizgaghin                                                                                        | Red.                                                                                                                                                                              | Hmr                          |
| Azgzaw / Tazgzawt<br>Izgzawn / Tizgzawin                                                                                        | Green.                                                                                                                                                                            | Khder                        |
| Aqhwi / Taqhwi<br>Iqhwayn / Tiqhwayin                                                                                           | Maroon.                                                                                                                                                                           | Qhwi                         |
| Ongal = Idili = Oghmi /<br>Tongalt = Tididlit =<br>Toghmit<br>Ongaln = Idalan = Oghman<br>/ Tongalin = Tidalatin =<br>Toghmiyin | Dark.                                                                                                                                                                             | K'hel/ghameq                 |
| K'hel = Asgane = Afkhan /<br>K'hla = Tasgant = Tafkhant<br>K'helin = Isgane = Ifkhan /<br>K'hlat = Tisganin =<br>Tifkhanin      | Black.                                                                                                                                                                            | K'hel                        |
| Imoche / Tamocht<br>Imochen / Timochin                                                                                          | With dark spots.                                                                                                                                                                  | Mnqtin / mkhltin             |
| <b>Geographical origin (national toponym)</b>                                                                                   |                                                                                                                                                                                   |                              |
| Lmllalia                                                                                                                        | From Beni Mellal (Beni Mellal).                                                                                                                                                   | Lmllalia                     |
| El Attaouia                                                                                                                     | From El Attaouia (El Kelâa des Sraghna).                                                                                                                                          | El Attaouia                  |
| Asni                                                                                                                            | From Asni (Al Haouz).                                                                                                                                                             | Asni                         |
| Onayn (Ouneine)                                                                                                                 | Valley in Taroudant, Souss-Massa.                                                                                                                                                 | Onayn                        |
| <b>Geographical origin (international toponym)</b>                                                                              |                                                                                                                                                                                   |                              |
| Italien                                                                                                                         | From Italy.                                                                                                                                                                       | Italien                      |
| Americain                                                                                                                       | From USA.                                                                                                                                                                         | Americain                    |
| Canada                                                                                                                          | From Canada.                                                                                                                                                                      | Canada                       |
| Australia                                                                                                                       | From Australia.                                                                                                                                                                   | Australia                    |
| <b>Commercial names</b>                                                                                                         |                                                                                                                                                                                   |                              |
| Sonacos                                                                                                                         | Moroccan seed commercialization society.                                                                                                                                          | Sonacos                      |
| Vita                                                                                                                            | Commercial variety of pea.                                                                                                                                                        | Vita                         |

| Transliteration in<br>Tamazight* | Description                                                                                                                                        | Transliteration<br>in Darija |
|----------------------------------|----------------------------------------------------------------------------------------------------------------------------------------------------|------------------------------|
| Lincoln                          | English heirloom of pea (very sweet).                                                                                                              | Lincoln                      |
| Karim                            | High yield potential hard wheat cultivar. Registered in 1985.                                                                                      | Karim                        |
| Marzaq                           | High yield potential hard wheat cultivar. Registered in 1984.                                                                                      | Marzaq                       |
| <b>Anthroponyms</b>              |                                                                                                                                                    |                              |
| Moha w Said                      | Historical figure.                                                                                                                                 | Moha w Said                  |
| <b>Other</b>                     |                                                                                                                                                    |                              |
| N'igdad                          | Literally meaning "of birds".                                                                                                                      | Dyal tyor                    |
| Adkoy                            | Two names have been reported for <i>Avena sativa</i> , one of them being termed Khrtal identically as the black durum wheat variety (irdn ifkhan). | Adkoy                        |
| Irdn ifkhan                      |                                                                                                                                                    | Gemh k'hel                   |
| Morgh                            | Unknown.                                                                                                                                           | Morgh                        |

\*For some Amazigh modifiers the masculine singular, feminine singular, masculine plural and feminine plural forms are provided, as well as their variations. Amazigh terms in italics correspond to those borrowed from Darija.

**Table S3.** Diversity index estimates from HHS. Community richness and evenness, average HH richness and evenness, divergence and number of households surveyed are reported for each crop at each site

| CROP      | Site              | Community Richness | Community Evenness  | Divergence | Average HH Richness | Average Hh Evenness |
|-----------|-------------------|--------------------|---------------------|------------|---------------------|---------------------|
| Barley    | Ait Abbas         | 1                  | 0                   | NA         | 1                   | 0                   |
| Barley    | Ait Boualli       | 1                  | 0                   | NA         | 1                   | 0                   |
| Barley    | Ait Lkak          | 2                  | 0.392623438429506   | 0          | 2                   | 0.392623438429506   |
| Barley    | Ait Oumdis        | 1                  | 0                   | NA         | 1                   | 0                   |
| Barley    | Amizmiz           | 1                  | 0                   | NA         | 1                   | 0                   |
| Barley    | Anamer - Taourirt | 3                  | 0.576998675772075   | 0          | 3                   | 0.576998675772075   |
| Barley    | Asni              | 3                  | 0.473086419753086   | 0          | 3                   | 0.473086419753086   |
| Barley    | Bernat            | 1                  | 0                   | NA         | 1                   | 0                   |
| Barley    | Ighrem            | 1                  | 0                   | NA         | 1                   | 0                   |
| Barley    | Iminifri          | 1                  | 0                   | NA         | 1                   | 0                   |
| Barley    | Tabant            | 2                  | 0.00187148931267522 | 0          | 2                   | 0.00187148931267522 |
| Barley    | Tahannaout        | 1                  | 0                   | NA         | 1                   | 0                   |
| Barley    | Talat N'Yaaqoub   | 1                  | 0                   | NA         | 1                   | 0                   |
| Barley    | Talha             | 1                  | 0                   | NA         | 1                   | 0                   |
| Barley    | Tamda Noumercid   | 1                  | 0                   | NA         | 1                   | 0                   |
| Barley    | Tissa             | 1                  | 0                   | NA         | 1                   | 0                   |
| Barley    | Tnin Ourika       | 2                  | 0.00345124076587666 | 0          | 2                   | 0.00345124076587666 |
| Barley    | Wabzaza           | 1                  | 0                   | NA         | 1                   | 0                   |
| Barley    | Zaouiat Ahansal   | 3                  | 0.0692857142857142  | 0          | 3                   | 0.0692857142857142  |
| Wheat     | Ait Abbas         | 3                  | 0.510119375573921   | 0          | 3                   | 0.510119375573921   |
| Wheat     | Ait Boualli       | 1                  | 0                   | NA         | 1                   | 0                   |
| Wheat     | Ait Oumdis        | 1                  | 0                   | NA         | 1                   | 0                   |
| Wheat     | Asni              | 3                  | 0.255769395750522   | 0          | 3                   | 0.255769395750522   |
| Wheat     | Bernat            | 3                  | 0.540298241716704   | 0          | 3                   | 0.540298241716704   |
| Wheat     | Iminifri          | 2                  | 0.47620008849005    | 0          | 2                   | 0.47620008849005    |
| Wheat     | Tabant            | 2                  | 0.047590719809637   | 0          | 2                   | 0.047590719809637   |
| Wheat     | Tahannaout        | 2                  | 0.380746349378042   | 0          | 2                   | 0.380746349378042   |
| Wheat     | Talat N'Yaaqoub   | 1                  | 0                   | NA         | 1                   | 0                   |
| Wheat     | Talha             | 4                  | 0.409996033447901   | 0          | 4                   | 0.409996033447901   |
| Wheat     | Tamda Noumercid   | 4                  | 0.484741498255012   | 0          | 4                   | 0.484741498255012   |
| Wheat     | Tissa             | 2                  | 0.33098972417523    | 0          | 2                   | 0.33098972417523    |
| Wheat     | Tnin Ourika       | 2                  | 0.249236965084029   | 0          | 2                   | 0.249236965084029   |
| Wheat     | Wabzaza           | 2                  | 0.375               | 0          | 2                   | 0.375               |
| Wheat     | Zaouiat Ahansal   | 2                  | 0.116507175053938   | 0          | 2                   | 0.116507175053938   |
| Fava bean | Ait Lkak          | 4                  | 0.680941358024691   | 0          | 4                   | 0.680941358024691   |
| Fava bean | Anamer - Taourirt | 5                  | 0.770763540208486   | 0          | 5                   | 0.770763540208486   |
| Fava bean | Asni              | 6                  | 0.202607165156513   | 0          | 6                   | 0.202607165156513   |
| Fava bean | Ighrem            | 2                  | 0.5                 | 0          | 2                   | 0.5                 |
| Fava bean | Iminifri          | 1                  | 0                   | NA         | 1                   | 0                   |



|           |                   |   |                    |    |   |                    |
|-----------|-------------------|---|--------------------|----|---|--------------------|
| Fava bean | Tahannaout        | 3 | 0.536443148688047  | 0  | 3 | 0.536443148688047  |
| Fava bean | Talat             | 2 | 0.3577777777777778 | 0  | 2 | 0.3577777777777778 |
| Fava bean | N'Yaaqoub         | 3 | 0.599647266313933  | 0  | 3 | 0.599647266313933  |
| Fava bean | Tamda             | 3 | 0.599647266313933  | 0  | 3 | 0.599647266313933  |
| Fava bean | Noumercid         | 3 | 0.599647266313933  | 0  | 3 | 0.599647266313933  |
| Fava bean | Tnin Ourika       | 2 | 0.244897959183674  | 0  | 2 | 0.244897959183674  |
| Fava bean | Zaouiat           | 1 | 0                  | NA | 1 | 0                  |
| Fava bean | Ahansal           | 1 | 0                  | NA | 1 | 0                  |
| Pea       | Ait Lkak          | 1 | 0                  | NA | 1 | 0                  |
| Pea       | Anamer - Taourirt | 3 | 0.575309904506571  | 0  | 3 | 0.575309904506571  |
| Pea       | Asni              | 3 | 0.548571428571429  | 0  | 3 | 0.548571428571429  |
| Pea       | Bernat            | 3 | 0.0153406860033868 | 0  | 3 | 0.0153406860033868 |
| Pea       | Ighrem            | 2 | 0.375              | 0  | 2 | 0.375              |
| Pea       | Tahannaout        | 2 | 0.373132030860359  | 0  | 2 | 0.373132030860359  |
| Pea       | Talat             | 2 | 0.355029585798817  | 0  | 2 | 0.355029585798817  |
| Pea       | N'Yaaqoub         | 2 | 0.355029585798817  | 0  | 2 | 0.355029585798817  |
| Pea       | Talha             | 1 | 0                  | NA | 1 | 0                  |
| Pea       | Tamda             | 2 | 0.281556962262175  | 0  | 2 | 0.281556962262175  |
| Pea       | Noumercid         | 2 | 0.281556962262175  | 0  | 2 | 0.281556962262175  |
| Pea       | Tnin Ourika       | 2 | 0.489795918367347  | 0  | 2 | 0.489795918367347  |
| Pea       | Zaouiat           | 1 | 0                  | NA | 1 | 0                  |
| Pea       | Ahansal           | 1 | 0                  | NA | 1 | 0                  |
| Alfalfa   | Ait Abbas         | 2 | 0.31809019904258   | 0  | 2 | 0.31809019904258   |
| Alfalfa   | Ait Oumdiss       | 1 | 0                  | NA | 1 | 0                  |
| Alfalfa   | Amizmiz           | 1 | 0                  | NA | 1 | 0                  |
| Alfalfa   | Anamer - Taourirt | 3 | 0.120275084994261  | 0  | 3 | 0.120275084994261  |
| Alfalfa   | Asni              | 2 | 0.496415648613126  | 0  | 2 | 0.496415648613126  |
| Alfalfa   | Bernat            | 2 | 0.1958             | 0  | 2 | 0.1958             |
| Alfalfa   | Iminifri          | 1 | 0                  | NA | 1 | 0                  |
| Alfalfa   | Tabant            | 2 | 0.021418704363975  | 0  | 2 | 0.021418704363975  |
| Alfalfa   | Tahannaout        | 3 | 0.165408622441573  | 0  | 3 | 0.165408622441573  |
| Alfalfa   | Talat             | 3 | 0.4224             | 0  | 3 | 0.4224             |
| Alfalfa   | N'Yaaqoub         | 3 | 0.4224             | 0  | 3 | 0.4224             |
| Alfalfa   | Talha             | 1 | 0                  | NA | 1 | 0                  |
| Alfalfa   | Tamda             | 1 | 0                  | NA | 1 | 0                  |
| Alfalfa   | Noumercid         | 1 | 0                  | NA | 1 | 0                  |
| Alfalfa   | Tissa             | 1 | 0                  | NA | 1 | 0                  |
| Alfalfa   | Tnin Ourika       | 4 | 0.670413223140496  | 0  | 4 | 0.670413223140496  |
| Alfalfa   | Wabzaza           | 1 | 0                  | NA | 1 | 0                  |
| Alfalfa   | Zaouiat           | 1 | 0                  | NA | 1 | 0                  |
| Alfalfa   | Ahansal           | 1 | 0                  | NA | 1 | 0                  |

**Table S4.** Scoring from 1 to 4 (higher score for best scenarios) of the different characteristics of sites (Agroecological zones, soil quality, accessibility by road, distance to local market, size of the nearest market, economic situation, water availability for irrigation)

| Name                              | Hub   | Agro<br>ecological<br>zone | Soil<br>quality | Accessibility | Distance<br>to local<br>market | Size of<br>nearest<br>market | Economic<br>situation | Water<br>availability<br>(for<br>irrigation) | Index |
|-----------------------------------|-------|----------------------------|-----------------|---------------|--------------------------------|------------------------------|-----------------------|----------------------------------------------|-------|
| <b>Aagrab<br/>Tnin<br/>Ourika</b> | - ALH | 6                          | 2               | 3             | 3                              | 3                            | 3                     | 3                                            | 23    |
| <b>Bernat</b>                     | AZI   | 5                          | 3               | 3             | 3                              | 3                            | 2                     | 3                                            | 22    |
| <b>Amizmiz</b>                    | ALH   | 6                          | 2               | 3             | 3                              | 3                            | 3                     | 1                                            | 21    |
| <b>Tahannaout</b>                 | ALH   | 6                          | 2               | 3             | 3                              | 3                            | 3                     | 1                                            | 21    |
| <b>Tamda<br/>Noumercid</b>        | AZI   | 6                          | 3               | 3             | 3                              | 3                            | 2                     | 1                                            | 21    |
| <b>Iminifri</b>                   | DEM   | 5                          | 2               | 3             | 3                              | 3                            | 3                     | 2                                            | 21    |
| <b>Asni</b>                       | ALH   | 6                          | 2               | 2             | 2                              | 3                            | 3                     | 2                                            | 20    |
| <b>Tissa</b>                      | AZI   | 5                          | 3               | 2             | 2                              | 3                            | 3                     | 2                                            | 20    |
| <b>Tabant</b>                     | DEM   | 3                          | 3               | 2             | 3                              | 3                            | 3                     | 3                                            | 20    |
| <b>Talha</b>                      | AZI   | 4                          | 3               | 3             | 3                              | 3                            | 2                     | 1                                            | 19    |
| <b>Ait Abbas</b>                  | DEM   | 5                          | 3               | 1             | 2                              | 2                            | 2                     | 2                                            | 17    |
| <b>Zaouiat<br/>Ahansal</b>        | AZI   | 4                          | 3               | 2             | 2                              | 1                            | 1                     | 3                                            | 16    |
| <b>Ait<br/>Oumdis</b>             | DEM   | 4                          | 1               | 1             | 1                              | 3                            | 1                     | 3                                            | 14    |
| <b>Talat<br/>N'Yaaqoub</b>        | ALH   | 4                          | 1               | 1             | 3                              | 1                            | 1                     | 2                                            | 13    |
| <b>Ait Boualli</b>                | DEM   | 3                          | 3               | 1             | 1                              | 1                            | 1                     | 3                                            | 13    |
| <b>Ait Lkak</b>                   | ALH   | 2                          | 1               | 2             | 1                              | 1                            | 2                     | 3                                            | 12    |
| <b>Wabzaza</b>                    | AZI   | 1                          | 3               | 1             | 1                              | 3                            | 1                     | 1                                            | 11    |
| <b>Anamer<br/>Taourirt</b>        | - ALH | 2                          | 1               | 1             | 1                              | 1                            | 1                     | 2                                            | 9     |
| <b>Ighrem</b>                     | ALH   | 2                          | 1               | 1             | 1                              | 1                            | 1                     | 2                                            | 9     |

**Table S5.** Scores of each hub and varietal richness for each of the target species

| Site_Name                  | HUB      | Index | Alfalfa | Barley | Fava bean | Pea | Wheat | TOT |
|----------------------------|----------|-------|---------|--------|-----------|-----|-------|-----|
| <i>Aagrab -Tnin Ourika</i> | Al Haouz | 23    | 4       | 2      | 2         | 2   | 2     | 12  |
| <i>Ait Lkak</i>            | Al Haouz | 12    | 0       | 2      | 4         | 1   | 0     | 7   |
| <i>Amizmiz</i>             | Al Haouz | 21    | 1       | 1      | 0         | 0   | 0     | 2   |
| <i>Anamer - Taourirt</i>   | Al Haouz | 9     | 2       | 3      | 5         | 3   | 0     | 13  |
| <i>Asni</i>                | Al Haouz | 20    | 2       | 3      | 8         | 3   | 3     | 19  |
| <i>Ighrem</i>              | Al Haouz | 9     | 1       | 1      | 3         | 1   | 0     | 6   |
| <i>Tahnnaout</i>           | Al Haouz | 21    | 3       | 1      | 3         | 2   | 2     | 11  |
| <i>Talat N'Yaaqoub</i>     | Al Haouz | 13    | 2       | 1      | 2         | 2   | 1     | 8   |
| <i>Bernat</i>              | Azilal   | 22    | 2       | 1      | 0         | 2   | 4     | 9   |
| <i>Talha</i>               | Azilal   | 19    | 1       | 1      | 0         | 1   | 4     | 7   |
| <i>Tamda Noumercid</i>     | Azilal   | 21    | 1       | 1      | 3         | 1   | 4     | 10  |
| <i>Tissa</i>               | Azilal   | 20    | 1       | 1      | 0         | 0   | 2     | 4   |
| <i>Wabzaza</i>             | Azilal   | 11    | 1       | 1      | 0         | 0   | 2     | 4   |
| <i>Zaouiat Ahansal</i>     | Azilal   | 16    | 1       | 3      | 1         | 1   | 2     | 8   |
| <i>Ait Abbas</i>           | Demnate  | 17    | 1       | 1      | 0         | 0   | 3     | 5   |
| <i>Ait Boualli</i>         | Demnate  | 13    | 0       | 1      | 0         | 0   | 1     | 2   |
| <i>Ait Oumdis</i>          | Demnate  | 14    | 1       | 1      | 0         | 0   | 1     | 3   |
| <i>Iminifri</i>            | Demnate  | 21    | 1       | 1      | 2         | 0   | 2     | 6   |
| <i>Tabant</i>              | Demnate  | 20    | 1       | 1      | 0         | 0   | 2     | 4   |

## References

18. Frankel, O.H.; Brown, A.H.D.; Burdon, J.J. *The Conservation of Plant Biodiversity*; Cambridge University Press: Cambridge, UK, 1995; 299p.
19. Thomas, M.; Dawson, J.C.; Goldringer, I.; Bonneuil, C. Seed exchanges, a key to analyze crop diversity dynamics in farmer-led on-farm conservation. *Genet. Resour. Crop Evol.* **2011**, *58*, 321–338. <https://doi.org/10.1007/s10722-011-9662-0>.
